# Supplementary material
Source: Elsevier journal article supplement (https://www.sciencedirect.com/science/article/pii/S021391112100340X)
Supplement: mmc1 [file S021391112100340X:mmc1.pdf]

## Apéndice A

### ENTREVISTA 1

¿Puedes explicarme un poco ~~su-tu~~ situación en España (regular, laboral, familiar, etc.)?

Bueno, yo estoy en España desde 2007 y trabajo en los mercadillos. También voy a vender en las calles y los bares todos los días. No tengo papeles, pero actualmente mi abogado se está encargando de esto y lo hemos solicitado en extranjería. Vivo con mis amigos que venimos del mismo pueblo.

¿Puedes contarme si has experimentado algunas dificultades para el acceso a la salud?

Gracias a ~~D~~ios nunca he tenido problemas para ver ~~al~~ médico, aunque no tengo papeles. Primero desde que ~~lleguéve~~ en la isla en 2007. Nos revisaron los médicos y después cuando salí de allí me dieron un papel y con ese papel he obtenido la tarjeta sanitaria.

¿Conoces algunos amigos o familiares que ~~han~~ayan experimentado algunas dificultades para el acceso a la salud?

~~Sí~~ conozco gente que no pueden ir al centro de salud y siempre van a urgencias. Una vez llevé un paisano mío que no tenía familia aquí y estuvimos mucho tiempo poque no llevaba mucho tiempo aquí, pero por suerte tenía su pasaporte. Entregamos su pasaporte y le dejaron ver un médico. Después de un mes, me ~~llegóe~~ una carta en mi casa porque puse mi dirección postal y en la carta pusieron que tenía que pagar noventa y pico euros, me acuerdo muy bien de eso.

¿Cuándo fue eso? ¿~~T~~-te acuerdas?

Creo que fue ~~en-a~~ finales del año ~~de~~-2018.

¿Puedes contarme si tienes conocimientos sobre los seguros formales en España?

~~Sí~~ conozco los seguros privados de los bancos. Yo tenía uno en ~~La~~ Caixa. Abrí una cuenta allí en 2007 con mi pasaporte y tenía un seguro de vida. Ahora, por ejemplo, no tengo, porque si ~~eres~~-no tienes papeles no te dejan tener cuenta ~~por-en~~ ningún banco por una ley, me dijeron cuando me cerraron la cuenta. Pero yo dejé de tener el seguro cuando se creó nuestra tontina. Prefería la tontina porque era una cosa con los paisanos, nos ayudamos mutuamente.

¿Puedes contarme si has experimentado algunas dificultades para la contratación de un seguro formal?

No, la verdad, como he dicho antes, nunca, gracias a ~~D~~ios.

¿Puedes contarme si conoces algunos amigos o familiares que ~~han~~ayan experimentado algunas dificultades para la contratación de un seguro formal?

Muchos, el chico que te he contado antes, y a él le conozco, y hay muchos s como él, ~~el~~ sobre todo los que acaban de llegar y no conocen a nadie. Yo he ayudado mucho para obtener la tarjeta sanitaria. Y hay muchos s que llegan aquí y no tienen ningún papel, nada de nada, ni si quiera una partida de nacimiento de Senegal. Yo los entiendo muy bien, porque pasé también por donde han pasado. He llegado aquí con barco y sueles tirar todas tus cosas, yo lo hice, como todos. Pero después, si no puedes mostrar un pasaporte, es muy difícil obtener cualquier cosa aquí.

## ENTREVISTA 2

**¿Puedes explicarme un poco su-tu situación en España (regular, laboral, familiar, etc.)?**

Yo tengo papeles, llevo mucho tiempo aquí.

**¿Cuánto?**

Creo que unos 11 años, me trajo mi padre. Pero ahora mismo vivo con mi familia y estoy trabajando en un restaurante como ayudante de cocinero.

**¿Puedes contarme si has experimentado algunas dificultades para el acceso a la salud?**

No, yo siempre que he tenido problemas s de salud ~~voy he ido~~ al méedico.

**¿Conoces algunos amigos o familiares que hayan experimentado algunas dificultades para el acceso a la salud?**

No, H~~he~~ escuchado algo en las reuniones de la tontina, pero no conozco a nadie personalmente.

**¿Sueles escucharlo de manera frecuente?**

No, solo algunas veces.

**¿Cada cGuánto?**

No sé.

**¿Cuántas veces al año, por ejemplo?**

No sé, la verdad, a lo mejor un ao o dos.

**¿Puedes contarme si tienes conocimientos sobre los seguros formales en España?**

Claro que sí, pero prefiero la tontina, porque ~~si~~ entre nosotros se resuelve inmediatamente sin papeleo.

**¿Puedes contarme si has experimentado algunas dificultades para la contratación de un seguro formal?**

No tengo seguro ~~de~~-privado o del banco, y la verdad es que no lo he intentado hacer. Pero tengo la seguridad social.

¿Puedes contarme si conoces algunos amigos o familiares que hayan experimentado algunas dificultades para la contratación de un seguro formal?

No, ahora mismo, no sé ningún caso.

### ENTREVISTA 3

¿Puedes explicarme un poco su-tu situación en España (regular, laboral, familiar, etc.)?

Yo hago venta ambulante, por las mañanas, y por la noche voy al centro a vender bolsos.

¿Cuánto tiempo llevas aquí?

Casi ~~dos~~-2 años.

¿Cuál es tu situación en España? ¿Tienes tarjeta de residencia?

No.

¿Puedes contarme si has experimentado algunas dificultades para el acceso a la salud?

Sí, por ejemplo, no tengo tarjeta sanitaria y solo puedo ir a urgencias. Una vez fui al centro salud de Zaidin y me pidieron empadronamiento y un formulario, y yo fui a urgencias porque no tenía pasaporte. Llevo mucho tiempo para arreglar mi pasaporte. Pero ya sabes, en Senegal la cosa solo funciona rápido con dinero.

¿Conoces algunos amigos o familiares que hayan experimentado algunas dificultades para el acceso a la salud?

Sí, hay mucha gente como yo, en la calle donde vendemos nos conocemos, pero gracias a ~~De~~ios nunca he conocido alguien que lo haya necesitado tanto.

¿A qué te refieres con «alguien que lo haya necesitado tanto»?

Por ejemplo, alguien que esté muy mal.

¿Puedes contarme si tienes conocimientos sobre los seguros formales en España?

Sí, pero no tengo acceso. Si no tienes papeles es difícil.

¿Puedes contarme si has experimentado algunas dificultades para la contratación de un seguro formal?

Sí, todavía no puedo obtener la tarjeta sanitaria. Y aquí no hay nadie que te pueda ayudar.

**¿Puedes contarme si conoces algunos amigos o familiares que hayan experimentado algunas dificultades para la contratación de un seguro formal?**

Aquí en la casa hay dos que acaban de llegar y están en la misma situación que yo. Es muy difícil aquí, hermano. Y gente como que deberían de ayudarnos para conocer nuestros derechos también.

#### ENTREVISTA 4

**¿Puedes explicarme un poco su-tu situación en España (regular, laboral, familiar, etc.)?**

Trabajo en los mercadillos donde me encontraste. Llevo 8 años en Granada, antes vivía antes en Madrid.

**¿Cuánto tiempo llevas en España?**

~~9~~ Nueve años.

~~Investigador~~ **¿Resides aquí con algunos familiares?**

Vivo con mi hermano.

**¿Puedes contarme si has experimentado algunas dificultades para el acceso a la salud?**

Yo nunca he tenido ese problema, gracias a Dios.

**¿Conoces algunos amigos o familiares que hayan experimentado algunas dificultades para el acceso a la salud?**

Sí, conozco varias personas que no tienen médico de familia porque no saben. Yo he tenido la suerte de que mi hermano está aquí y me ha ayudado mucho para obtener todo esto.

**¿Puedes contarme si tienes conocimientos sobre los seguros formales en España?**

Sí, tengo conocimientos de los seguros privados porque antes lo tenía ~~antes~~. Ahora no lo tengo. Es más caro también y no es asequible para los que no trabajan o aquellos que tienen trabajos precarios como la venta ambulante.

**¿Puedes contarme si has experimentado algunas dificultades para la contratación de un seguro formal?**

No, antes tenía un seguro de vida y dental en La Caixa.

**¿Sigues teniendo cuenta en La Caixa?**

No, ya no tengo, no es posible.

¿Por qué?

Porque no tengo tarjeta de residencia.

¿Puedes contarme si conoces algunos amigos o familiares que hayan experimentado algunas dificultades para la contratación de un seguro formal?

Sí, aquí nos conocemos muy bien entre los senegaleses y a veces escuchas cosas así.

¿Qué cosas? ¿Hay gente no pueden tener un seguros?

Sí, muchos. Los seguros privados son imposibles para los que no tienen papeles. También conozco gente que busca empadronarse para tener médico. De verdad, hay gente que viene hasta de Almería para empadronarse aquí. Hay gente que pagan para poder obtener empadronamiento.

¿Pero para poder tener acceso a los hospitales?

Sí, y también eso les ayuda para poder demostrar una prueba de cuánto tiempo llevan en España para luego solicitar la tarjeta de residencia.

## ENTREVISTA 5

¿Puedes explicarme un poco ~~su~~tu situación en España (regular, laboral, familiar, etc.)?

Yo estoy estudiando en la universidad, estoy en mi primer año, en el grado de Trabajo Sociales. Llegué ~~en a~~ España en 2019, pasando por ~~el A~~atlántico. Ahora, gracias a ~~D~~ios, tengo mi tarjeta de residencia y estoy estudiando.

¿Puedes contarme si has experimentado algunas dificultades para el acceso a la salud?

No, yo no. La verdad es que, desde que he llegado, he podido ir siempre a urgencias cuando ~~he~~ ~~querido~~.

¿Sólo a urgencias? ¿No tienes médico de familia, por ejemplo?

Sí, ~~sí~~, claro, también tengo.

¿Conoces algunos amigos o familiares que hayan experimentado algunas dificultades para el acceso a la salud?

Sí, hay gente que tiene ese problema y también conozco personas mayores que necesitan que se cuide de ellos, pero no lo tienen y hay muchos. Yo vivo con un señor mayor que cada ~~2~~-dos

por tres va al hospital, pero luego nadie lee ayuda para sus tratamientos. Yo creo que estos señores necesitan asistencia en casa y eso no se lo pueden dar otros inmigrantes, porque todos salimos por la mañana a trabajar. Hay gentes que deciden volver a Senegal, pero hay muchos s que no se lo pueden permitir.

**¿Por qué?**

Porque se necesita dinero allí para curarse, y mucho. También está la familia, que muchos de aquí somos apoyos financieros de una familia muy grande.

**¿Cuántas gente depende de ti, por ejemplo?**

Yo ninguno, porque saben que estoy estudiando, pero aun así hay muchos que me llaman y me piden.

**¿Puedes contarme si tienes conocimientos sobre los seguros formales en España?**

Sí, conozco tanto las mutuas como la seguridad social. Por ejemplo, hay otros senegaleses que no son miembros de la tontina y dicen que tienen un seguro privado.

**¿Puedes contarme si has experimentado algunas dificultades para la contratación de un seguro formal?**

No, y-nunca he intentado contratar un seguro privado. Creo que son muy caros.

**¿Puedes contarme si conoces algunos amigos o familiares que han hayan experimentado algunas dificultades para la contratación de un seguro formal?**

Hay muchas personas que no tienen medios de-para tener un seguro privado porque van en el día a día, y luego tienen familiares en el país que dependen de él. No somos de aquí.

**¿Entonces el principal problema es un problema económico?**

Yo creo que sí. E-es verdad también que hay gente que no puede acceder a los seguros porque no tienen papeles, y gracias a Deios se ha tenido la idea de la tontina para estas personas.

## ENTREVISTA 6

**¿Puedes explicarme un poco su-tu situación en España (regular, laboral, familiar, etc.)?**

Yo trabajo como agente de seguridad en el Mercadona del centro. Vivo con mi esposo y mis dos hijos, pero también tengo el resto de mi familia ens Senegal.

**¿Tus padres, me imagino?**

Sí y mis hijos. Tengo hijos allí también.

¿Puedes contarme si has experimentado algunas dificultades para el acceso a la salud?

No, gracias a Dios, aquí es muy fácil y mi marido se encargó de todo.

¿De qué, por ejemplo?

De todos los papeles, del visado y luego cuando llegas tienes que hacer muchos papeleos y esperar muchas cartas para poder hacer algo.

¿Y durante este tiempo has necesitado un médico?

No, gracias a Dios.

¿Conoces algunos amigos o familiares que han experimentado algunas dificultades para el acceso a la salud?

No, no conozco mucha gente también.

¿No, es porque no vas en las reuniones de la tontina o las DAAHIRAS?

No, va mi marido. Le doy mis cotizaciones y ya está. No podemos ir los dos.

¿Puedes contarme si tienes conocimientos sobre los seguros formales en España?

Sí, tenía uno, pero luego lo dejé cuando me inscribí en la tontina.

¿Puedes contarme si has experimentado algunas dificultades para la contratación de un seguro formal?

No, no he tenido nunca este problema.

¿Puedes contarme si conoces algunos amigos o familiares que han experimentado algunas dificultades para la contratación de un seguro formal?

No, no conozco a ninguno.

## ENTREVISTA 7

¿Puedes explicarme un poco tu situación en España (regular, laboral, familiar, etc.)?

Bueno, yo actualmente no estoy trabajando, es muy difícil cuando no tienes residencia para trabajar aquí. Llevo 2 años y gracias a Dios tengo donde vivir, porque unos senegaleses me acogieron en su casa cuando salí de Cruz Roja.

¿Puedes contarme si has experimentado algunas dificultades para el acceso a la salud?

No he ido al hospital todavía, la verdad, pero tampoco tengo ningún papel.

**¿Es un problema no tener papeles para ir?**

A mí me han dicho que necesito mostrar un empadronamiento y llevo muy poco tiempo aquí, todavía no lo tengo.

**¿Conoces algunos amigos o familiares que han hayan experimentado algunas dificultades para el acceso a la salud?**

No, la verdad, no conozco a nadie.

~~Puedes contarme si tienes conocimientos sobre los seguros formales en España~~

~~No, cuando no hablas es español es muy difícil~~

**¿Puedes contarme si tienes conocimientos sobre los seguros formales en España?**

Sí, pero no tengo seguros privados y cuando he oído que se iba crear un fondo de social [con referencia a la tontina] he decidido unirme para ayudar.

**¿Puedes contarme si has experimentado algunas dificultades para la contratación de un seguro formal?**

Yo soy miembro de la tontina, no puedo tener seguro privado, no tengo papeles.

**¿Tienes seguro público? ¿Tienes médico de familia?**

No, tengo una tarjeta de Cruz Roja, ahora no sé dónde la tengo y cada vez que me pasa algo voy allí porque me dijeron que si voy en urgencias tienes que pagar después, si no es un problema para tener los papeles.

**¿Quiénes te lo dijeron?**

La gente con quienes comparto piso.

**¿Son también de Senegal?**

Sí.

**¿Y ellos han tenido ese problema? ¿Puedes contarme de uno de por ellos que han haya experimentado algunas dificultades para la contratación de un seguro formal?**

Sí, antes todos íbamos a Cruz Roja, ahora muchos tienen tarjeta sanitaria, pero antes íbamos todos allí porque no teníamos tarjeta sanitaria. Yo aún no tengo.

**¿Por qué?**

Porque estoy bien, gracias a Dios. Yo hasta que no me siento mal no me preocupo por esas cosas. Cuando lo necesite les preguntaré a ellos para hacer lo mismo.



## ENTREVISTA 8

**¿Puedes explicarme un poco ~~su~~tu situación en España (regular, laboral, familiar, etc.)?**

Yo vivo con mi familia aquí, trabajo como informático. Llevo 8 años en España, pero en Granada solo 1 año.

**Investigador. ¿Dónde residías antes?**

Primero en Madrid, donde he estudiado. También he estado trabando 1 año en Barcelona antes de venir en Granada.

**Investigador. ¿Entonces, supongo que tienes ~~la~~ tarjeta de residencia?**

Sí, gracias a Dios tengo mi tarjeta de residencia.

**¿Puedes contarme si has experimentado algunas dificultades para el acceso a la salud?**

Personalmente nunca, tocando madera.

**¿Conoces algunos amigos o familiares que ~~han~~hayan experimentado algunas dificultades para el acceso a la salud?**

Sí, cuando vivíaes en Madrid ~~vez~~ muchos casos, y a nivel de las DAAHIRAS se habla también de muchos casos, gente que acaba de llegar y sufren accidentes, gente que trabaja en negro y no tenía segurosde médico. He visto muchoss. Es verdad que el Estado se encargaba de muchos y también las asociaciones ~~también~~ han ayudado a muchoss. Muchos viernes, cuando iban a rezar, pedía ayudas para ellos.

**¿Puedes contarme si tienes conocimientos sobre los seguros formales en España?**

Sí, yi. Yo tenía uno.

**¿Ya no lo tienes?**

~~Qué~~ No sirve para nada, lo dejé cuando entré en la tontina. P-prefiero ayudar a los que pueden tener acceso con la tontina, aunque sea informal. Pero, por ejemplo, el seguro de salud del banco es formal, pero no todos podemos tenemos acceder a esta opción, los que no tienen papeles [~~refiriéndose a los inmigrantes irregulares~~] no pueden tenerlo.

**¿Puedes contarme si has experimentado algunas dificultades para la contratación de un seguro formal?**

No.

¿Puedes contarme si conoces algunos amigos o familiares que ~~han~~ayan experimentado algunas dificultades para la contratación de un seguro formal?

Sí, ya te he dicho que los inmigrantes sin papeles tienen este tipo de problemas. A, aquí en Granada no conozco muchos, pero en Madrid sí. También la tontina es para ayudar a estas personas, entonces es porque hay personas así.

## ENTREVISTA 9

¿Puedes explicarme un poco ~~su~~tu situación en España (regular, laboral, familiar, etc.)?

Yo tengo papeles, si es ~~a~~o es la pregunta.

¿Pero puedes hablarme también ~~de~~cuánto tiempo llevas aquí y si estás trabajando?

Llevo 5 años en España y estoy trabajando como soldadora en la empresa de mi marido.

¿Estás aquí con tu marido?

Sí, vivo con mi marido y nuestros hijos.

¿Puedes contarme si has experimentado algunas dificultades para el acceso a la salud?

No.

¿Conoces algunos amigos o familiares que ~~han~~ayan experimentado algunas dificultades para el acceso a la salud?

No conozco la verdad.

¿Puedes contarme si tienes conocimientos sobre los seguros formales en España?

No sé, yo solo conozco ~~a~~este porque me metió mi marido.

¿Puedes contarme si has experimentado algunas dificultades para la contratación de un seguro formal?

No.

¿Puedes contarme si conoces algunos amigos o familiares que ~~han~~ayan experimentado algunas dificultades para la contratación de un seguro formal?

Personalmente no conozco ~~a~~nadie la verdad.

## ENTREVISTA 10

**¿Puedes explicarme un poco ~~su~~tu situación en España (regular, laboral, familiar, etc.)?**

Yo trabajo en las campañas agrícolas, unos meses estoy en Granada en la campaña de olivos o de ajos, otros meses estoy en Murcia, Albacete, etc. No tengo papeles y no me gusta la venta ambulante, tuve muchos problemas cuando lo hacía y por esos problemas todavía no puedo obtener los papeles, y llevo 6 años en Granada.

**¿Puedes contarme si has experimentado algunas dificultades para el acceso a la salud?**

Para tener un médico de cabecera me acuerdo de que fue muy complicado, me ayudó una vecina, que me hizo un empadronamiento en su casa porque dónde había mucha gente que se habían empadronados. Después fui con ella, yo no entendía nada, me ayudó con los formularios y entonces pude tener un médico que me siguiera. Después me tuvieron que operar la rodilla, por eso lo necesitaba tanto.

**¿Pasaste mucho tiempo con ~~esto~~?**

Sí, porque primero iba solo y no entendía nada, y piden muchas cosas.

**¿Cómo cuáles?**

No lo sé, porque hablaba mi vecina con ellos al final y se encargó de todo ella.

**¿Conoces algunos amigos o familiares que ~~han~~hayan experimentado algunas dificultades para el acceso a la salud?**

Sí, conozco mucha gente como estos y les puse en contacto con mi vecina en este tiempo.

**¿Y ahora ~~por ejemplo~~ conoces gente así... con esos problemas?**

No, además ahora paso muy poco tiempo en Granada.

**¿Puedes contarme si tienes conocimientos sobre los seguros formales en España?**

Sí, conozco los seguros privados, pero son muy caros. Una vez fui a preguntar a ATIJARIWAFABANK, que es el CBAO de nuestro país, tengo cuenta allí y pregunté por un seguro de repatriación de cuerpo y era muy caro.

**¿Cuánto costaba?**

Casi ~~dos cientos~~200 euros al año.

**¿Entonces no lo contraste porque ~~era~~ muy caro?**

Sí.

¿Y has intentado contratar otros seguros para servicios médicos?

No.

¿Puedes contarme si conoces algunos amigos o familiares que han hayan experimentado algunas dificultades para la contratación de un seguro formal?

Sí, los que te he contado antes para tener la tarjeta sanitaria. Y los seguros privados casi nadie los contrata. Yo creo que está fuera de nuestro alcance.

## ENTREVISTA 11

¿Puedes explicarme un poco su tu situación en España (regular, laboral, familiar, etc.)?

Yo trabajo cómo intérprete jurado en San Antón, yo soy el que traduce los documentos de todos los senegaleses antes de que los lleven en a la Administración. Casi todos me conocen. Llevo 25 años aquí, ya tengo mi familia aquí viviendo conmigo.

¿Puedes contarme si has experimentado algunas dificultades para el acceso a la salud?

No he tenido nunca un problema de este tipo.

¿Conoces algunos amigos o familiares que han hayan experimentado algunas dificultades para el acceso a la salud?

Sí, mi sobrina, que llegó aquí en 2016, un día se cortó con un cristal y tuve que llevarla a urgencias. Esperé mucho rato porque no tenía tarjeta sanitaria. Acababa de llegar y su tarjeta de residencia estaba en trámite, y hasta que no tiene tuviera NIE no podíamos gestionar la cobertura sanitaria. Yo les expliqué todo esto, me dijeron que sí, pero la van a aceptar a financiación propia, es decir, yo tenía que pagar después. Después paso a cirugía. Luego para la cura la llevaba en el centro salud y allí me dijeron que no le podían asignar un médico todavía, que tenía que esperar, pero sin embargo me daban cita para un enfermo. Me ayudaron mucho en el centro de salud con ella, la verdad, porque me conocen.

¿Puedes contarme si tienes conocimientos sobre los seguros formales en España?

No, tengo mis seguros.

¿Cuáles?

Del coche, por ejemplo, ¿no?

¿Algún seguro médico?

Sí, tengo seguro dental<sup>es</sup>. También tenía seguro de vida con mi banco, pero hace tiempo que lo he dejado.

### ¿Por qué lo dejaste?

Lo contraté cuando estaba buscando seguro de repatriación en caso de morir aquí, no somos de aquí y hay que prever muchas cosas porque uno nunca sabe. Después, cuando hemos creado la tontina y uno de los objetivos era eso, pues lo cancelé. Y prefiero este, es más social y es mucho más barato que el seguro. A, aquí también pasa como en Senegal, no todos podemos permitirnos pagar el seguro de repatriación del banco. Y respecto a los seguros de vida, si no tienes familia ~~qui~~-qu<sup>é</sup>e pasa, yo creo que los bancos de aquí desconocen nuestras culturas, por ejemplo, con la tontina, si alguien se muere, podemos darle el dinero a un amigo que se lo lleve a la familia y es mucho más fácil.

### ¿Entonces nunca has tenido dificultades para contratar un seguro formal?

No.

### ¿Puedes contarme si conoces algunos amigos o familiares que ~~han~~ayan experimentado algunas dificultades para la contratación de un seguro formal?

No, personalmente no conozco a nadie. Sólo escucho en las reuniones de la tontina. Se habla de las dificultades de los inmigrantes sin papeles para tener tarjeta sanitaria, sobre todo los que acaban de llegar. Hay que ayudarles con las cosas administrativas para poder obtener esto también, pero de esto no se encarga todavía la tontina. Yo siempre se los digo. Tenemos que tener asesores para estos tipos de trámites, para ayudar a esas personas. No todo es el dinero que les damos cuando les hace falta. Hay que prever estas cosas y poner mejores disposiciones.

## ENTREVISTA 12

### ¿Puedes explicarme un poco ~~su~~-tu situación en España (regular, laboral, familiar, etc.)?

Yo trabajo en el campo. Llevo 8 años aquí y siempre he trabajado en el campo. Gracias a este trabajo tengo mis papeles ahora. Vivo con amigos, que son también de Senegal.

### ¿Puedes contarme si has experimentado algunas dificultades para el acceso a la salud?

No, la verdad es que nunca. Y voy muy poco, no me acuerdo ni de la última vez. Tengo buena salud ahora mismo, gracias a Dios.

### ¿Conoces algunos amigos o familiares que ~~han~~ayan experimentado algunas dificultades para el acceso a la salud?

No, no conozco gente con ese problema.

¿Puedes contarme si tienes conocimientos sobre los seguros formales en España?

Sí, con los bancos.

¿Puedes contarme si has experimentado algunas dificultades para la contratación de un seguro formal?

No, nunca lo he intentado.

¿Y para obtener tu tarjeta sanitaria?

Me ayudó mi jefe. Me lo hizo todo.

¿Puedes contarme si conoces algunos amigos o familiares que han hayan experimentado algunas dificultades para la contratación de un seguro formal?

Sí, tengo amigos que no llevan mucho tiempo aquí y están haciendo trámites para obtenerlo. El principal es tener un pasaporte y empadronamiento para obtener la tarjeta sanitaria. Son unos dolores de cabeza para ello y si no tienes quien te ayude es muy complicado.

## ENTREVISTA 13

¿Puedes explicarme un poco su-tu situación en España (regular, laboral, familiar, etc.)?

Yo trabajo en los mercadillos, vendo bocadillos a los senegaleses de los mercadillos. Vivo con mi tía, pero todavía no tengo papeles. Llevo dos-2 años en España.

¿Puedes contarme si has experimentado algunas dificultades para el acceso a la salud?

No, Es verdad que no tengo todavía tarjeta sanitaria, pero- Pero nunca he ido al médico también desde que pasé la revisión del centro de Cruz Roja.

¿Hace cuánto fue eso?

Dos años, más o menos.

¿Conoces algunos amigos o familiares que han hayan experimentado algunas dificultades para el acceso a la salud?

Claro, hay muchos como yo.

¿Puedes contarme si tienes conocimientos sobre los seguros formales en España?

Sí, los conozco, pero no tengo ninguno.

**¿Puedes contarme si has experimentado algunas dificultades para la contratación de un seguro formal?**

Sí, eso fue de las primeras cosas que intenté cuando empecé a entender un poco cómo funcionaba las cosas aquí. Nosotros no somos de aquí (España), si yo mañana estoy muy enfermo, ¿quién me cuida? Mi familia está muy lejos y prefiero curarme allí y si me tengo que morir que no les suponga un coste. Todos los senegaleses que se mueren aquí ponemos dinero entre nosotros y pagamos para que pueda volver con su familia y descansar en su tierra. Ningún senegalés quiere que le sepulten aquí y los seguros de salud de aquí no te permiten eso.

**¿Puedes contarme si conoces algunos amigos o familiares que han experimentado algunas dificultades para la contratación de un seguro formal?**

Los que no tenemos papeles tenemos esta dificultad y gracias a Dios tenemos la tontina para cosas como la que he mencionado antes. Estoy seguro de que si hablas con los que llevan la tontina o vas a las reuniones, vas a conocer mucha gente así.

#### ENTREVISTA 14

**¿Puedes explicarme un poco tu situación en España (regular, laboral, familiar, etc.)?**

Yo trabajo en el campo, fue el primer trabajo que encontré. Me costó mucho encontrarlo, pero ahora estoy bien.

**Muy bien. ¿Llevas mucho tiempo aquí?**

Sí, llevo 3 años.

**¿Con quién vives aquí? ¿Vives con familiares?**

No, vivo con amigos que son también de Senegal.

**¿Puedes contarme si has experimentado algunas dificultades para el acceso a la salud?**

Nunca. Puedo ir al médico cada vez que quiero.

**¿Conoces algunos amigos o familiares que han experimentado algunas dificultades para el acceso a la salud?**

Sí, muchos. Los que vienen en el campo muchos no tienen todavía tarjeta sanitaria y no pueden ir al médico. Todos cuando llegan lo primero que buscan es trabajo. No se preocupan por tramitar nada. Después si encuentras jefe, se ponen con esas cosas.

¿Puedes contarme si tienes conocimientos sobre los seguros formales en España?

Sí, si conozco los seguros privados.

¿Puedes contarme si has experimentado algunas dificultades para la contratación de un seguro formal?

No, no tengo ninguno y la verdad es que nunca he intentado contratar uno.

¿Puedes contarme si conoces algunos amigos o familiares que han/hayan experimentado algunas dificultades para la contratación de un seguro formal?

Sí, como te he dicho antes, muchos de las gentes que vienen a trabajar en el campo no tienen o tienen el medico en otra ciudad y no pueden cambiarlo por no tener empadronamiento. Pero los novatos, sobre todo. Es muy difícil aportar los documentos que les piden.

¿Qué documentos?

Creo que es empadronamiento, porque todos lo buscan. A mí también me lo pidieron y el pasaporte y un formulario. Creo que eso, solo eso. Pero es muy difícil para la gente que acaba de llegar.



**Tabla I**

Características de los participantes en las entrevistas

| Id  | Edad | <del>Genero</del> Sexo | Educación                                        | Estatus de inmigrante en España | Ocupación                                         | Familiares dependientes | <del>Tener</del> Conocimientos sobre seguros formales | <del>Tener</del> Seguro de salud privado | <del>Tener</del> Protección social pública | Dejar seguro privado por la tontina |
|-----|------|------------------------|--------------------------------------------------|---------------------------------|---------------------------------------------------|-------------------------|-------------------------------------------------------|------------------------------------------|--------------------------------------------|-------------------------------------|
| E1  | 52   | Hombre                 | Sin <del>e</del> Estudios                        | Indocumentado                   | Venta ambulante                                   | 8                       | <del>Si</del> Si                                      | No                                       | <del>Si</del> Si                           | <del>Si</del> Si                    |
| E2  | 40   | Hombre                 | Secundaria <del>e</del>                          | Documentado                     | Ayudante cocinero                                 | 6                       | <del>Si</del> Si                                      | No                                       | <del>Si</del> Si                           | No                                  |
| E3  | 46   | Hombre                 | Secundaria <del>e</del>                          | Indocumentado                   | Venta ambulante                                   | 7                       | <del>Si</del> Si                                      | No                                       | No                                         | No                                  |
| E4  | 48   | Hombre                 | Sin <del>e</del> Estudios                        | Indocumentado                   | Venta ambulante                                   | 12                      | <del>Si</del> Si                                      | No                                       | <del>Si</del> Si                           | No                                  |
| E5  | 21   | Hombre                 | Univer <del>s</del> itaria <del>e</del>          | Documentado                     | Estudiante                                        | 0                       | <del>Si</del> Si                                      | No                                       | <del>Si</del> Si                           | No                                  |
| E6  | 44   | Mujer                  | Sin <del>e</del> Estudios                        | Documentada <del>e</del>        | Agente de seguridad                               | 11                      | <del>Si</del> Si                                      | No                                       | <del>Si</del> Si                           | <del>Si</del> Si                    |
| E7  | 38   | Hombre                 | Sin <del>e</del> Estudios                        | Indocumentado                   | Desempleado                                       | 9                       | No                                                    | No                                       | No                                         | No                                  |
| E8  | 30   | Hombre                 | <del>Estudios</del> Universitari <del>ae</del> s | Documentado                     | Informático                                       | 10                      | <del>Si</del> Si                                      | <del>Si</del> Si                         | <del>Si</del> Si                           | <del>Si</del> Si                    |
| E9  | 42   | Mujer                  | Secundaria <del>e</del>                          | Documentada <del>e</del>        | Soldadora                                         | 11                      | No                                                    | No                                       | <del>Si</del> Si                           | No                                  |
| E10 | 46   | Hombre                 | Secundaria <del>e</del>                          | Indocumentado                   | Obrero <del>a</del> Agrícola                      | 7                       | <del>Si</del> Si                                      | No                                       | <del>Si</del> Si                           | No                                  |
| E11 | 56   | Hombre                 | <del>Estudios</del> Universitari <del>ae</del> s | Documentado                     | Traductor <del>_____</del> ja Jurado <del>a</del> | 11                      | <del>Si</del> Si                                      | No                                       | <del>Si</del> Si                           | <del>Si</del> Si                    |
| E12 | 30   | Hombre                 | Sin <del>e</del> Estudios                        | Documentado                     | Obrero <del>a</del> Agrícola                      | 9                       | <del>Si</del> Si                                      | No                                       | <del>Si</del> Si                           | No                                  |

|     |    |        |                       |                        |                          |    |                         |    |                         |    |
|-----|----|--------|-----------------------|------------------------|--------------------------|----|-------------------------|----|-------------------------|----|
| E13 | 35 | Mujer  | Sin <u>e</u> Estudios | Indocumentada <u>e</u> | Venta <u>a</u> Ambulante | 5  | <del>Si</del> <u>Si</u> | No | No                      | No |
| E14 | 45 | Hombre | Sin <u>e</u> Estudios | Indocumentado          | Obrero <u>a</u> Agrícola | 11 | <del>Si</del> <u>Si</u> | No | <del>Si</del> <u>Si</u> | No |

## Apéndice B

### Explicar las razones de su adherencia a la tontina.

P1: No estamos en nuestro país y no sabemos cuándo vuelveremos, y cada vez que una persona tenía un problema no podíamos llevarlo de vuelta a casa, solíamos ir pidiendo 30 euros por las casas antes cuando uno de origen senegalés se había muerto o tenía problemas de salud. Antiguamente la gente participaba cada vez que pedíamos, pero de repente con la crisis no llegábamos a las cantidades que hacían falta para la repatriación o ayudar a alguien a volver a casa ~~entonces~~. Entonces decidimos ~~de~~ crear esta tontina. Yo soy parte de los que crearon esta tontina en Granada.

P2: A mí, por ejemplo, me metió mi marido y creo que también hay que unirse a todo lo que hace el bien. No somos de aquí. Para ayudar a los que menos tienen, los que tienen problemas de salud, los que se quedan sin dinero por quiebra ~~de~~ su negocio, por ejemplo, la tontina no es solo para los que se mueren.

P4: Yo tenía un seguro en La Caixa, pero cuando he oído que se iba crear un fondo ~~de~~ social [~~refiriéndose a la tontina~~] he decidido unirme para ayudar a los demás. Yo pagaba 70 euros anuales en los bancos, pagaba más, pero también si pasa algo el beneficio que uno gana con los bancos es mayor. Pero aquí, poniendo 25 euros estoy ayudando a otros que no podían pagar 70 euros en el banco. La tontina es más social.

P8: A mí es porque la propuesta me convenció, en caso de repatriación no necesitas que tus familiares pongan el dinero y había visto que ayudaban a mucha gente.

P10: Yo tenía un seguro con el banco y un día un senegalés se murió y estuvo casi un mes y no pudimos llevarlo, nos faltó dinero. Y después decidimos crear esta tontina. Y también es una recomendación de nuestra religión.

P1: Claro, porque nos ayudamos mutuamente.

P7: Además, la tontina tiene unas funciones muy razonables para nuestra comunidad, somos muchos aquí y nos necesitamos mutuamente.

### Investigador: ¿Qué funciones tiene la tontina?

P7: Es una ayuda mutua, el que es miembro, imagínate, tocando madera, que le pase algo [~~refiriéndose a la muerte~~] eso permite que ~~le~~ lleveamos de retorno a Senegal, porque aquí nadie quiere quedarse ~~aquí~~. Todos queremos una sepultura en un cementerio ~~respecto-conforme~~ a nuestra religión y que se ~~no~~ sepulten en nuestra tierra, cerca de nuestros familiares. Ser miembro de esta tontina te permite esto. No vamos a ir pidiendo dinero entre tus familiares para

llevarte, porque antes es lo que había. Cuando uno se moría aquí, éramos nosotros sus familiares y muchos no tienen dinero aquí, todo lo que tienen lo mandan a sus familias y entre nosotros teníamos que poner dinero para llevarlos. Íbamos de casa en casa para coleccionar dinero y con la crisis hemos dicho esto ya no es posible recoger 4000 euros hace 25 años lo hacemos en un día ahora ni en dos semanas y un cuerpo no puede estar aquí todo este tiempo, esta es la razón de que todo senegalés debería de ser parte de esta tontina. Uno solo cotiza 25 euros. Sabes que con 25 euros no puedes hacer nada solo. Es la unión lo que hace la fuerza. Y uniéndonos sí podemos hacer todo esto.

P3: Yo creo que la mejor prevención es la tontina. Es la mejor prevención. El único objetivo de la tontina es prevención. Uno solo no puede ni con sus necesidades, esto es Europa, en África voyas donde voyas, hay necesidades que uno solo no puede cubrir. Solo es posible entre todos.

P4: Además, nuestra tontina no tiene restricciones como los seguros formales y podemos permitir a los inmigrantes de origen senegaleses, especialmente los más vulnerables, a participar en ella. En nuestra comunidad hay muchas personas sin papeles y tienen problemas para tener acceso a los seguros formales.

P1: Hay muchas personas sin papeles que no tienen acceso ni a los seguros de banco ni a los seguros del Estado y nuestra tontina permite incluir a esta gente con una transparencia. Nuestro modelo parece formal, tiene sus miembros, elegimos nuestros tesoreros, sabemos dónde está el dinero, podemos controlarlo.

P8: Hay transparencia, es para todos los senegaleses, lo gestionamos nosotros y nos conocemos muy bien. Hay un grupo de personas que controlan todos los niveles y es como un sistema formal: vamos y hablamos con la gente para decirles cómo funciona y en cada evento que tenemos les recordamos la importancia. Tenemos un tesorero y por cada aportación recibes una factura y todos tienen una tarjeta de miembro de la asociación.

P1, P4, P5, P6, P10: Claro.

P2: Claro, hay confianza total, porque no lo dirige una persona, sino mucha gente, y para sacar dinero no lo puede hacer una persona, sino mucha gente, y necesitan firmas.

### **Barreras/dificultades que han experimentado (experiencias personales o de personas cercanas) para el acceso a la salud en España**

P1: Creo que, primero, hay que saber que no solo tenemos el problema de salud entre nuestras necesidades. Nuestra unidad familiar es tan grande y a veces y los que dependen de ti es tan grande que uno solo no puede prever una cosa para 20 personas. Y tenemos nuestra cultura y religión, que nos dice de ayudar a los demás y tienes más prioridad que tener un dinero ahorrado. Tenemos una cultura que pesa mucho y te obliga a ayudar a los que realmente dependen de ti y los que no. Si no lo haces, eres muy malo para todo el mundo. Muchas veces te llaman a fin

de mes para pagar medicinas, consultaciones, etc. Solo Deios nos ayuda, porque si te pasa algo también afecta a tus familiares.

P5: Yo estoy de acuerdo con P1 y se puede resumir en la vida de un inmigrante senegalés. Su salario, después de pagar el alquiler, todo va para las necesidades de sus familiares. Y solo Deios nos ayuda porque nunca prevemos el riesgo de las enfermedades dentro de esas necesidades, esperamos la llamada de que uno de la familia está enfermoa para solucionarlo y a veces te llaman los vecinos para sus problemas. Por eso, cuando nos pasa algo siempre lo pensamos dos veces antes de ir al hospital.

P7: Es verdad, pero todos preferimos conocer la opinión de los médicos antes.

P1, P2, P4, P5, P8, P9, P10: Claro.

P1: Es más seguro.

P3: Esto es verdad [~~refiriéndose en lo que se ha dicho~~]. Otra cosa es que nosotros también tenemos nuestra cultura y muchas veces funciona mejor. Hay personas que se tratan aquí en los hospitales durante mucho y no ven cura, y cuando empiezan a tomar las medicinas tradicionales ven mejora. Yo quería darle medicinas tradicionales a mi mujer, que estuvo casi tres meses en coma, y no me dejaron.

P10: Sí, eso es verdad, muchos piensan en la medicina tradicional cuando llevamos tiempo aquí.

P2: Es parte de nuestra cultura, por eso siempre hay muchos más que van ~~en a~~ la medicina tradicional. También ha sido eficaz durante años cuando no teníamos hospitales. Muchas gentes que viven en los pueblos [~~con referencia a su país de origen~~] siguen creyendo más en la medicina tradicional que en la medicina moderna. ~~Y~~ incluso la gente que tiene estudios también van a la medicina tradicional porque es parte de nosotros.

P6: Yo conozco mucha gente que llevan tratamiento durante años aquí y muchos te dicen que quieren ver la medicina tradicional, ya que esta opción existe.

P3: Claro, porque es parte también de nuestra cultura y es muy eficaz.

P4: En general, cuando el méedico ~~te~~ dice que queda poco tiempo de vida, la gente prefiere mirar los tratamientos tradicionales. Yo he vivido con uno que está en esta situación y quería volver a Senegal para probar la medicina tradicional, y tenía muchos problemas económicos porque no estuvo trabajando durante mucho tiempo por los tratamientos.

### **Soluciones aportadas a las barreras/dificultades que han discutido para el acceso a la salud.**

P3: Los beneficios son: si te mueres o tienes algún problema, te ayudamos para llevarte a casa y pagar el vuelo al que lo lleva, y sus familiares no tienen que estar pidiendo dinero para llevarlo

como antes, y si por ejemplo ~~también~~ tus padres se mueren en Senegal, también te damos 300 euros para que ~~lo~~ les organices unos funerales.

P6: "Muchas gentes piensan en la medicina tradicional cuando llevan meses con tratamiento y no ven mejoras, y también hay otras personas que, por ejemplo, el méedico les dice que les queda ~~n~~ poco tiempo de vida y prefieren volver con sus familiares, y todo esto nuestra tontina lo garantiza con una ayuda económica."

P1: Es una ayuda mutua, el que es miembro, imagínate, tocando madera, que le pase algo [~~refiriéndose a la muerte~~] eso permite que le lleveamos de retorno a Senegal porque nadie quiere quedarse aquí. Todos queremos una sepultura en un cementerio ~~respecto~~ conforme a nuestra religión y que se no ~~se~~ sepultra en nuestra tierra cerca de nuestros familiares. Ser miembro de esta tontina te permite esto.

P3: Eso es, nuestra tontina permite a todas las personas que quieren volver ~~en~~ a Senegal por problemas de salud volver con sus familias.

P9: También se encarga de financiar el tratamiento de las medicinas tradicionales, eso es prácticamente lo que hace la tontina.

### Otras contribuciones de las tontinas en el acceso a la salud (tanto de sus experiencias en España ~~co~~ mo en Senegal)

P7: Actualmente, por ejemplo, la tontina es muy beneficiosa en Senegal. Por ejemplo, los que ~~los~~ la usan con objetivos de celebraciones matrimoniales u otras cosas son exitosos y solo ~~lo~~ la usan gente que decimos que no pueden ahorrar nada al fin de mes. Así como tal ~~si~~ lo hacemos para la salud y funciona. Aquí, ~~cotizamos~~ no todos la misma cantidad, tenemos muy en cuenta la gente que no puede hacerlo porque nos conocemos muy bien, y si le pasa algo a alguien le damos una cantidad con ~~el~~ la que se paga las consultaciones e incluso sus medicinas.

P3: Nuestra tontina también ayuda a todos los senegaleses sin papeles que tienen problemas par-a acceder a los seguros del Eestado o de los bancos. Si eres miembro y tienes este problema, nosotros nos encargamos siempre de pagar medicamentos o tratamientos que se necesiten.

P1: Es verdad, se me había olvidado antes. Además, no hay que olvidar que hay muchos senegaleses sin papeles.

P8: Las tontinas contribuyen muchísimo en Senegal. Yo he visto un caso en mi pueblo en el que un padre ~~pierde~~ perdió ~~ade~~ su hijo y le dijeron que si no pagaba ba no recibíae el cuerpo, y pagóe la tontina de su pueblo. He visto también un inmigrante que su mujer pasóe por una operación para tener un hijo. Se murió y le dijeron lo mismo, y tuvo que pagar la tontina.

P2: En nuestro país, la tontina ha funcionado de maravilla, ha contribuido en las construcciones de casas, muchos ~~s-se~~ han hecho bodas y es muy nuestro. es la mejor opción para la salud. Si la gente sigue en el informal ofrece algo que saben y que proviene del informal.

P10: Claro, la tontina es una cosa que va muy bien. muy usado por pobres. pero la mayoría luego usan el dinero para fines no importantes. S. Todavía no es muy usado. pero seguro si lo cogemos como alternativa no habría mejor que eso. Solo habría que hacer comprender a la gente que hay una forma posible y muy nuestra de poder financiar nuestra propia salud. por-que los seguros que por ejemplo hay en Senegal no sabe del mundo occidental, no es nada nuestro.



Tabla II

Características de los participantes en la discusión de grupo

| <b>Id</b> | <b>Edad</b> | <b><del>Genero</del>Sexo</b> | <b>Educación</b>             | <b>Estatus de inmigrante</b><br><b>en-españa</b> | <b>Ocupación</b>             | <b>Familiares dependientes</b> |
|-----------|-------------|------------------------------|------------------------------|--------------------------------------------------|------------------------------|--------------------------------|
| P1        | 31          | Hombre                       | Secundaria <del>a</del><br>e | Indocumentado                                    | Venta ambulante              | 4                              |
| P2        | 28          | Hombre                       | Secundaria <del>a</del><br>e | Indocumentado                                    | Obrero agrícola              | 6                              |
| P3        | 46          | Mujer                        | Sin estudios                 | Indocumentada <del>e</del>                       | Obrera <del>e</del> agrícola | 8                              |
| P4        | 43          | Hombre                       | Secundaria <del>a</del><br>e | Indocumentado                                    | Venta ambulante              | 6                              |
| P5        | 63          | Hombre                       | Sin estudios                 | Documentado                                      | Venta ambulante              | 14                             |
| P6        | 66          | Hombre                       | Sin estudios                 | Indocumentado                                    | Venta ambulante              | 12                             |
| P7        | 56          | Hombre                       | Sin estudios                 | Indocumentado                                    | Venta ambulante              | 6                              |
| P8        | 39          | Hombre                       | Sin estudios                 | Indocumentado                                    | Venta ambulante              | 5                              |
| P9        | 67          | Mujer                        | Sin estudios                 | Documentada <del>e</del>                         | Jubilada                     | 9                              |
| P10       | 23          | Hombre                       | Secundaria <del>a</del><br>e | Indocumentado                                    | Venta ambulante              | 7                              |
